# Supplementary material for: The nonclassical crystallization mechanism and growth kinetics of densely packed fluorapatite nanorod arrays: effects of the ion transportation rate and fluoride concentration
Source: Royal Society of Chemistry journal article supplement (doi:10.1039/d3qm00191a), 2023-01-01
Supplement: d3qm00191a1.pdf [file d3qm00191a1.pdf]

## Supplementary Information

### Nonclassical crystallization mechanism and growth kinetics of densely packed fluorapatite nanorod arrays: effects of ions transportation rate and fluoride concentration

Meng Cai,<sup>a,b</sup> Yiting Wang,<sup>a</sup> Luyao Wan,<sup>a</sup> Hang Ping,<sup>a,b</sup> Wenxuan Wang,<sup>a,b</sup> Weimin Wang,<sup>a,b</sup> Hao Wang,<sup>a,b</sup> Zhaoyong Zou<sup>a,b,\*</sup> and Zhengyi Fu<sup>a,b,\*</sup>

*a. State Key Laboratory of Advanced Technology for Materials Synthesis and Processing, Wuhan University of Technology, Wuhan 430070, China.*

*b. Hubei Longzhong Laboratory, Xiangyang 441000, Hubei, China.*

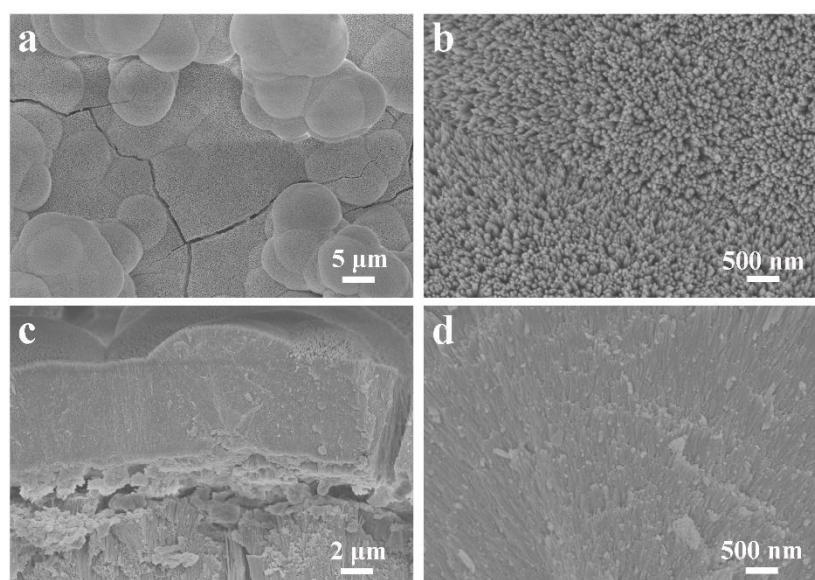

**Figure S1.** SEM images of grown layer on transverse slice after reaction for 72 h via adding  $\text{Ca}^{2+}$  solution to  $\text{PO}_4^{3-}/\text{F}^-$  premixed solution (transverse slices were immersed in premixed solution). (a, b) Top view. (c, d) side view. (b) and (d) are the magnified images of (a) and (c). Flow rate: 0.212  $\mu\text{l/s}$ .

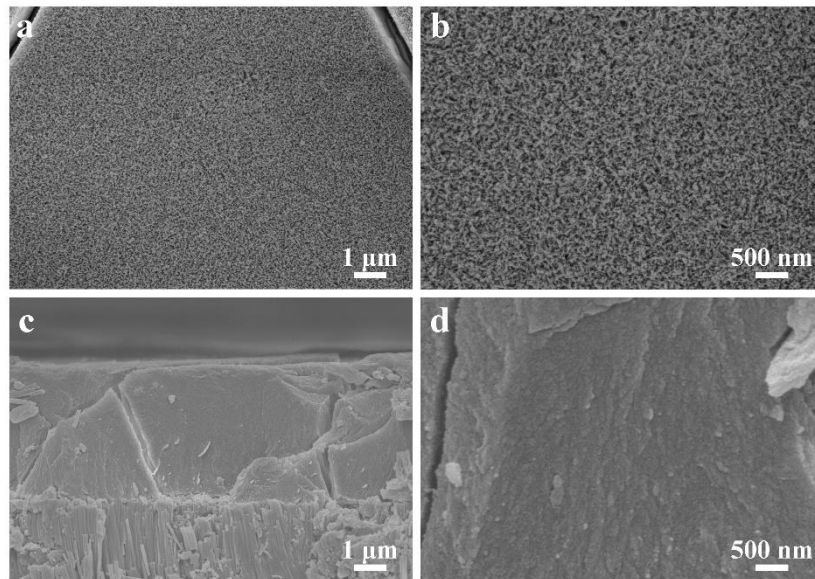

**Figure S2.** SEM images of grown layer on transverse slice after reaction for 72 h via simultaneously adding  $\text{Ca}^{2+}$  solution and  $\text{PO}_4^{3-}/\text{F}^-$  premixed solution to a 250 ml beaker where transverse slices were immersed in. (a, b) Top view. (c, d) side view. (b) and (d) are the magnified images of (a) and (c). Flow rate: 0.212  $\mu\text{l/s}$ .
